# Supplementary material
Source: MDPI journal article supplement (https://www.mdpi.com/1999-4907/12/1/90)
Supplement: s1 [file s1]

**Supplementary Materials, Part I—ArcGIS Survey 123 survey tool for used in Wood Products for Cultural Uses; Johnson, A., Clavijo, A.E., Hamar, G., Head, D.A., Thoms, A., Price, W., Lapke, A., Crotteau, J., Cervený, L.K., Wilmer, H., Petershoare, L., Cook, A., and Reid, S.**

## **Supplementary Materials, Part II – More information on youth programs used in Wood Products for Cultural Uses**

Alaskan Youth Stewards (AYS) is an overarching youth development group that incorporates the Training Rural Alaskan Youth Leaders & Students (TRAYLS) and USFS Youth Conservation Corps (YCC) programs in Southeast Alaska. Each crew's youth participants are chosen annually based upon an application and interview process. The AYS Program crews are funded by the USFS, the Organized Village of Kake, the Hoonah Indian Association, the Angoon School District, and other partners including Sealaska Corporation, the National Forest Foundation, the Sustainable Southeast Partnership, among others.

The 2020 youth crews varied in size: Angoon YCC had a total of eight crew members with two adult crew leaders; Hoonah TRAYLS had a total of three crew members with one adult leader; Kake TRAYLS/YCC had a total of five crew members with one adult leader.

Kake crew leader and youth development consultant, Audrey Clavijo, created a Youth Citizen Science WPOCH Project Guide (link below) for AYS crew leaders and youth researchers (crew members and student interns). The purpose of the Project Guide was to define WPOCH research goals, to outline community member discussion procedures and safety guidelines, and to provide optional interactive activities for youth to learn more about the cultural arts and local environment. Additionally, the guide provided crews and interns with a list of suggested community members (well-known carvers, weavers, influential stakeholders, agency officials, etc.) for youth to contact for research discussions.

*Link to Project Guide: [https://drive.google.com/file/d/1Zcbi2asbiBN7Dqt2OXSjQpAZ6Iyyd\\_T3/view?usp=sharing](https://drive.google.com/file/d/1Zcbi2asbiBN7Dqt2OXSjQpAZ6Iyyd_T3/view?usp=sharing)*
