# Supplementary material
Source: MDPI journal article supplement (https://www.mdpi.com/1999-4907/12/1/90)
Supplement: s1 [file s1]

Supplementary Materials, Part III - Codes Used for Wood Products for Cultural Uses; Johnson, A., Clavijo, A.E., Hamar, G., Head, D.-A., Thoms, A., Price, W., Lapke, A., Crotteau, J., Cervený, L.K., Wilmer, H., Petershoare, L., Cook, A., and Reid, S.

Note: wood product traditional skills (i.e. carving and weaving) will be referred to henceforth as "artforms" in the definitions below despite the writer's understanding that this term is not completely accurate or inclusive of these traditional skills

| Codes:                          |                                 |                                            | Definitions/comments:                                                                                                                                                                                                                                      |                                                                                                                                                                                                                                                     |
|---------------------------------|---------------------------------|--------------------------------------------|------------------------------------------------------------------------------------------------------------------------------------------------------------------------------------------------------------------------------------------------------------|-----------------------------------------------------------------------------------------------------------------------------------------------------------------------------------------------------------------------------------------------------|
| Primary                         | Secondary                       | Tertiary                                   |                                                                                                                                                                                                                                                            |                                                                                                                                                                                                                                                     |
| Significant Wood Product        | Participation                   | Change                                     | Examples of wood products interviewee lists as important or significant or to have value                                                                                                                                                                   |                                                                                                                                                                                                                                                     |
|                                 |                                 |                                            | Examples of a person's participation or association with wood products or the practice of these artforms (may include participating/observing ceremonies to celebrate wood products)                                                                       |                                                                                                                                                                                                                                                     |
|                                 |                                 |                                            | Examples of some kind of change in the quantity, quality, practices/techniques, or purpose(s) associated with wood products or artforms (carving/weaving/preparations)                                                                                     |                                                                                                                                                                                                                                                     |
|                                 |                                 |                                            | Lesser quantity of wood products or lesser amount of these practices being observed in the culture/community                                                                                                                                               |                                                                                                                                                                                                                                                     |
|                                 |                                 |                                            | Increase in the quantity of wood products or increased participation of the artforms observed in the culture/community                                                                                                                                     |                                                                                                                                                                                                                                                     |
|                                 | Purpose                         | Neutral of practices                       | Includes changes that do not seem to have a positive nor negative effect overall                                                                                                                                                                           |                                                                                                                                                                                                                                                     |
|                                 |                                 |                                            | A change specifically associated to the practices, purpose/use, traditions, preparations, etc.                                                                                                                                                             |                                                                                                                                                                                                                                                     |
|                                 |                                 |                                            | Examples of how the product(s) is/are used and/or what the purpose of them is                                                                                                                                                                              |                                                                                                                                                                                                                                                     |
|                                 |                                 |                                            | When the purpose of the wood product is supportive in the continuation of Native culture/traditions/values                                                                                                                                                 |                                                                                                                                                                                                                                                     |
|                                 |                                 |                                            | When the purpose of the wood product is to be burned as firewood                                                                                                                                                                                           |                                                                                                                                                                                                                                                     |
| WPOCH Values                    | Keep culture alive              | Firewood                                   | When the purpose of the wood product is used for ceremony, upholding Native values (ex: product is used to be given to the opposite clan in a traditional ku'eex)                                                                                          |                                                                                                                                                                                                                                                     |
|                                 |                                 |                                            | When the purpose of the wood product is to honor or remember a person/clan/tribe/place/thing/event/tradition/etc. Includes telling history of a place, person, event, legends or values. Also includes mortuary poles which honor the deceased.            |                                                                                                                                                                                                                                                     |
|                                 |                                 |                                            | When the purpose of the wood product is to connect peoples, cultures, communities, etc. May include connecting someone to an ancestor to their clan; examples of identity                                                                                  |                                                                                                                                                                                                                                                     |
|                                 |                                 |                                            | When the wood product is used for everyday use, such as a "utility woven cedar hat" or a "woven basket" to carry water or goods or hunting/fishing equipment/tools                                                                                         |                                                                                                                                                                                                                                                     |
|                                 |                                 |                                            | When the purpose of the wood product is to be used as ingestible/topical medicine to improve or promote health                                                                                                                                             |                                                                                                                                                                                                                                                     |
|                                 | Cultural /Spiritual             | Learning from elders, passing on knowledge | Cultural Knowledge/Literacy                                                                                                                                                                                                                                | When a response directly or indirectly refers to cultural or spiritual values associated with these artforms                                                                                                                                        |
|                                 |                                 |                                            |                                                                                                                                                                                                                                                            | Responses relating or referring to the passing down of knowledge/skills/traditions by elders, family members, or others; may also refer to this as a tradition/native value                                                                         |
|                                 |                                 |                                            |                                                                                                                                                                                                                                                            | Responses relating or referring to cultural knowledge or literacy (inc. traditions, language, skills); typically spoken about in context of more or less people being involved in their culture, heritage, language and traditions                  |
|                                 |                                 |                                            |                                                                                                                                                                                                                                                            | Responses relating or referring to the loss/decrease of cultural knowledge or literacy in the past, future, or present                                                                                                                              |
|                                 |                                 |                                            |                                                                                                                                                                                                                                                            | Responses relating or referring to the increase/growth/revitalization of cultural knowledge or literacy in the past, future, or present                                                                                                             |
| Traditions, rituals, ceremonies | Sharing stories, songs          | Connection                                 | Responses relating or referring to Native language(s); may include a CM's use of language or explanation of term/word                                                                                                                                      |                                                                                                                                                                                                                                                     |
|                                 |                                 |                                            | Responses relating or referring to Native traditions, rituals, or ceremonies                                                                                                                                                                               |                                                                                                                                                                                                                                                     |
|                                 |                                 |                                            | Responses relating or referring to the art of storytelling and song, common in Native culture                                                                                                                                                              |                                                                                                                                                                                                                                                     |
|                                 |                                 |                                            | Responses relating or referring to the connection associated with these arts, Native culture and traditions, Native values, etc.                                                                                                                           |                                                                                                                                                                                                                                                     |
|                                 |                                 |                                            | When the connection is between one and their culture or heritage/ancestry                                                                                                                                                                                  |                                                                                                                                                                                                                                                     |
| Identity                        | Native values                   | Frame of mind                              | When the connection is between members of the community                                                                                                                                                                                                    |                                                                                                                                                                                                                                                     |
|                                 |                                 |                                            | When the connection spans cultures, countries, languages, (all boundaries), uniting all people and things                                                                                                                                                  |                                                                                                                                                                                                                                                     |
|                                 |                                 |                                            | Responses pertaining to the elements of Native identity- the culture, lifestyle, language, history, legends, traditions, etc. all being interwoven into one "fabric" or web that support one another's existence/continuation                              |                                                                                                                                                                                                                                                     |
|                                 |                                 |                                            | Responses relating or referring to one's personal or collective identity                                                                                                                                                                                   |                                                                                                                                                                                                                                                     |
|                                 |                                 |                                            | Responses relating to, referring to, or stating Native values                                                                                                                                                                                              |                                                                                                                                                                                                                                                     |
|                                 | Creativity                      | Joy, peace, back to better time            | Health                                                                                                                                                                                                                                                     | Responses relating or referring to the person's frame of mind, typically in the case of doing cultural arts/practices (ex: the positive frame of mind needed to weave)                                                                              |
|                                 |                                 |                                            |                                                                                                                                                                                                                                                            | When the frame of mind elicits positive feelings inc. joy, peace, calm, happiness, or happy nostalgia                                                                                                                                               |
|                                 |                                 |                                            |                                                                                                                                                                                                                                                            | Responses relating or referring to the creativity required or elicited by these arts/skills                                                                                                                                                         |
|                                 |                                 |                                            |                                                                                                                                                                                                                                                            | Responses that relate wood products/artforms with health and well-being (mental, emotional, and/or physical)                                                                                                                                        |
|                                 |                                 |                                            |                                                                                                                                                                                                                                                            | Responses relating or referring to trauma (inc. PTSD)                                                                                                                                                                                               |
| Education                       | Trauma                          | Recovery                                   | Responses relating or referring to the process of recovery and/or healing, typically spoken about in reference to the positive health effects of culture                                                                                                   |                                                                                                                                                                                                                                                     |
|                                 |                                 |                                            | Responses relating or referring to the history and/or repercussions of western colonization, cultural oppression, and assimilation of Alaska Native peoples                                                                                                |                                                                                                                                                                                                                                                     |
|                                 |                                 |                                            | Responses relating or referring to the process of reconnecting with culture/heritage/traditions/arts leading to increased health and wellbeing                                                                                                             |                                                                                                                                                                                                                                                     |
|                                 |                                 |                                            | Responses relating or referring to the use/practice of traditional artforms as a way to avoid the use of negative substances (i.e. alcohol and drugs)                                                                                                      |                                                                                                                                                                                                                                                     |
|                                 |                                 |                                            | Responses relating or referring to sober, "clean" mindset and body being the result, requirement, or traditional value of the artforms                                                                                                                     |                                                                                                                                                                                                                                                     |
|                                 | Apprentice                      | Carving shed                               | School                                                                                                                                                                                                                                                     | Responses that speak to the creation/learning of wood product artforms; learning one-on-one in traditional apprentice style, in classes, in school, or at culture camp; also includes responses about the supplies, materials, personnel needed     |
|                                 |                                 |                                            |                                                                                                                                                                                                                                                            | Responses relating or referring to a traditional apprentice-style learning between a master and student; may be one-on-one or small groups of students learning under one expert (master)                                                           |
|                                 |                                 |                                            |                                                                                                                                                                                                                                                            | Responses relating or referring to the learning of these skills in the carving shed; may include opinions about the need of a carving shed                                                                                                          |
|                                 |                                 |                                            |                                                                                                                                                                                                                                                            | Responses relating or referring to the learning of these skills in school; may include statements and opinions about needing more classes in the schools                                                                                            |
|                                 |                                 |                                            |                                                                                                                                                                                                                                                            | Responses relating or referring to the learning of these skills in classes (may include statements about needing or the presence of classes)                                                                                                        |
| Culture camp                    | Investments, expense            | Grants/Funding                             | Responses relating or referring to the learning of these skills in camps that teach and encourage Native culture, traditions, and skills                                                                                                                   |                                                                                                                                                                                                                                                     |
|                                 |                                 |                                            | Responses relating or referring to the costs with teaching this artforms and skills, funding used or how funding should be/could be used; typically includes material and supply expenses, cost of teacher compensation, etc.                              |                                                                                                                                                                                                                                                     |
|                                 |                                 |                                            | Responses that relate or refer to grants and/or funding (current, past, or future opportunities)                                                                                                                                                           |                                                                                                                                                                                                                                                     |
|                                 |                                 |                                            | Responses that relate or refer to tourism                                                                                                                                                                                                                  |                                                                                                                                                                                                                                                     |
|                                 |                                 |                                            | Responses relating or referring to tourism activities in which local people are sharing the culture of their community/people/clan/art with tourists                                                                                                       |                                                                                                                                                                                                                                                     |
| Tourism                         | Increased Opportunities         | Commoditization/Commodification            | Responses relating or referring to opportunities created by tourism which may benefit carvers/weavers/artisans/the community/the culture/the art                                                                                                           |                                                                                                                                                                                                                                                     |
|                                 |                                 |                                            | Responses relating to tourism resulting in commoditization of wood products (not as "special" because of competing markets or "priceless/invaluable" good that now has a price)                                                                            |                                                                                                                                                                                                                                                     |
|                                 |                                 |                                            | Responses relating to competing markets (typically Asian) that make fake, inexpensive (typically inaccurate) replicas of wood products; may include statements about these competitors being in stores, reducing local artisans' fair prices               |                                                                                                                                                                                                                                                     |
|                                 |                                 |                                            | Responses that relate or refer to income (associated with wood products/art)                                                                                                                                                                               |                                                                                                                                                                                                                                                     |
|                                 |                                 |                                            | Responses that relate or refer to the capitalistic nature of modern society and/or its effects on Native wood products/artforms                                                                                                                            |                                                                                                                                                                                                                                                     |
|                                 | Income                          | Capitalism                                 | Don't want to sell                                                                                                                                                                                                                                         | Responses that relate or refer to artists/CMs who are NOT interested in selling wood products for various reasons including the belief that these works are priceless, for the practice of gifting these items, or other reasons                    |
|                                 |                                 |                                            |                                                                                                                                                                                                                                                            | Responses that relate or refer to these arts not being a viable or important source of income for various reasons including the cost of supplies, the lack of market, the commoditization, the lack of resources, etc.                              |
|                                 |                                 |                                            |                                                                                                                                                                                                                                                            | Responses that relate or refer to opportunities which allow artists/CMs to make money by creating and/or selling wood products or classes to teach others                                                                                           |
|                                 |                                 |                                            |                                                                                                                                                                                                                                                            | Responses that relate or refer to the nonmonetary value of wood products via opportunities to trade and barter their products and/or materials for other goods and services                                                                         |
|                                 |                                 |                                            |                                                                                                                                                                                                                                                            | Management                                                                                                                                                                                                                                          |
| Access                          | Increase/Opportunity            | Decrease/Barrier                           | Responses that relate or refer to the accessibility of resources (inc. cedar wood, bark, and spruce roots) and the barriers or opportunities available or that could exist which would or do make these resources easier or harder to get                  |                                                                                                                                                                                                                                                     |
|                                 |                                 |                                            | Responses that relate or refer to opportunities that currently exist or could exist that increase accessibility of resources (inc. cedar wood, bark, and spruce roots) or the general increase in the access of these resources in the past/present/future |                                                                                                                                                                                                                                                     |
|                                 |                                 |                                            | Responses that relate or refer to barriers that currently exist or could exist that increase the accessibility of resources (inc. cedar wood, bark, and spruce roots) or the general decrease in the access of these resources in the past/present/future  |                                                                                                                                                                                                                                                     |
|                                 |                                 |                                            | Responses that relate or refer to the management or policy surrounding tourism/tourists                                                                                                                                                                    |                                                                                                                                                                                                                                                     |
|                                 |                                 |                                            | Responses that relate or refer to visitors being ignorant of their impact on the environment, people, or culture of the place they visit                                                                                                                   |                                                                                                                                                                                                                                                     |
|                                 | Visitors unaware of impact (NS) | Native sustainability (NS)                 | Learning from elders, passing on knowledge                                                                                                                                                                                                                 | Responses that speak about Native sustainability and Native forest management                                                                                                                                                                       |
|                                 |                                 |                                            |                                                                                                                                                                                                                                                            | Responses that relate or refer to how forest traditions (inc. harvesting practices) are taught and passed along by elders or other CMs; may speak about the importance of this traditional passing on of knowledge                                  |
|                                 |                                 |                                            |                                                                                                                                                                                                                                                            | Responses that relate or refer to the Native values of respect, reciprocity, balance, and gratitude; for example- "everything has a spirit", "respect the forest", "give thanks to the trees/nature", "never take more than you need/can use", etc. |
|                                 |                                 |                                            |                                                                                                                                                                                                                                                            | Respect, reciprocity, balance, gratitude                                                                                                                                                                                                            |
|                                 |                                 |                                            |                                                                                                                                                                                                                                                            |                                                                                                                                                                                                                                                     |

|                     |                                 |                                                                                                                                                                                                                                               |
|---------------------|---------------------------------|-----------------------------------------------------------------------------------------------------------------------------------------------------------------------------------------------------------------------------------------------|
| Forest Service (FS) | traditions                      | Responses that relate or refer to the traditions related to being sustainable                                                                                                                                                                 |
|                     | stewardship                     | Responses that relate or refer to protecting and fostering the environment by being a guardian and "steward" of the resources and the ecosystem                                                                                               |
|                     | connection to trees             | Responses that relate or refer to Native peoples' connective, intimate relationship with the trees/ the forest                                                                                                                                |
|                     | Selective harvest               | Responses that relate or refer to sustainable practices of selecting specific trees to be used for resource collection                                                                                                                        |
|                     |                                 | Responses that relate to the United States Forest Service (inc. their management, policies, regulations, individual's experiences, etc.)                                                                                                      |
|                     | Regulations/policy              | Responses that relate or refer to regulations and/or policies of the USFS                                                                                                                                                                     |
|                     | permit process                  | Responses about a specific permit process including the cultural wood permit                                                                                                                                                                  |
|                     | difficulties                    | Responses that relate or refer to having struggles with the USFS personnel, paperwork, permit process, reguations, management policies, etc.                                                                                                  |
|                     | communication, collaboration    | Responses that relate or refer to communication and/or collaboration with the USFS; typically responses state a need for increased communication or working together (community and FS) on policy, projects, management, etc.                 |
|                     | positive experience             | Responses that relate or refer to a positive experience working with, completing processes, and/or communicating with the USFS, and/or agreement with FS policies, regulations, management, etc. of the USFS                                  |
|                     | extraction                      | Responses that relate or refer to an intense removal of resources (inc. timber, mined resources, fish, etc.) of the USFS or partnering companies, usually without the consent of the local people                                             |
|                     | timber harvest                  | Responses that relate or refer to the harvest of wood (both old growth and new growth)                                                                                                                                                        |
|                     | roads                           | Responses that relate or refer to roads (usually built by the USFS and/or partnering companies) for the harvesting of resources; roads may be seen as positive (i.e. inc. access) and/or negative (i.e. increased resource extraction)        |
|                     | Opportunities                   | Responses that relate or refer to opportunities that the USFS could act upon in order to strengthen relations between the agency and the community (especially the wood artists/ culture-bearers)                                             |
|                     | Honor Wood Products/Artists     | Responses that relate or refer to specific opportunities in which the USFS could show respect/appreciation towards wood artists and cultural artforms                                                                                         |
|                     | Engage in Culture               | Responses that relating to specific opportunities in which the USFS could enhance their own cultural competency by hands-on, direct engagement with the culture (art workshops, language, food processing, etc., involvement in Culture Camp) |
|                     | capitalism                      | Responses the relate or refer to the capitalistic nature of the US/Western World, which drives the sell/purchase of goods/resources                                                                                                           |
|                     | undervalue trees                | Responses that relate or refer to the USFS not valuing (monetarily AND/OR non-monetarily) cedar/wood as highly as Native and/or local peoples                                                                                                 |
|                     |                                 |                                                                                                                                                                                                                                               |
|                     |                                 |                                                                                                                                                                                                                                               |
| Youth               |                                 |                                                                                                                                                                                                                                               |
| Messages to Youth   |                                 |                                                                                                                                                                                                                                               |
|                     | Learn, prepare, engage          | Responses that relate or refer to the push for youth to learn, prepare, and/or engage in their culture/heritage/artforms/traditions/community/policy/elders/etc.                                                                              |
|                     | Connect w/ identity and culture | Responses that relate or refer to the push for youth to connect with their personal/familial/clan/tribal identity and culture                                                                                                                 |
|                     | Be a steward of the environment | Responses that relate or refer to the push for youth to be good stewards (advocates for sustainability and protection) or their environments                                                                                                  |
| Youth Opportunities |                                 |                                                                                                                                                                                                                                               |
|                     | Youth and Intern Programs       | Opportunities that are available to youth in the SE AK region                                                                                                                                                                                 |
|                     | TRAYLS                          | Programs that involve youth                                                                                                                                                                                                                   |
|                     | Elder engagement                | Responses that refer to Training Rural Alaskan Youth Leaders and Students (new name= Alaskan Youth Stewards) present in Kake, Hoonah, and POW. A partner of Youth Conservation Corps (Angoon, Kake)                                           |
|                     | Passing on traditions           | Responses that relate or refer to youth engaging with their elders                                                                                                                                                                            |
|                     | Stewardship                     | Responses that relate or refer to youth passing on the traditions they have been taught to the younger grenerations                                                                                                                           |
|                     | Serving community               | Responses that relate or refer to youth being good stewards of their environment or their communities                                                                                                                                         |
|                     | Apprenticeships                 | Responses that relate or refer to youth being selfless, serving the greater community, in whatever means necessary                                                                                                                            |
|                     | Forest Service forest jobs      | Responses that relate or refer to apprenticeships (art and non-art) that are available for youth (to work with a master)                                                                                                                      |
|                     | Relevant science                | Responses that relate or refer to opportunities with in the USFS agency for young people                                                                                                                                                      |
| Messages from youth |                                 |                                                                                                                                                                                                                                               |
|                     | Learn, prepare, engage          | Responses that relate or refer to oportunitnes within related scientific fields                                                                                                                                                               |
|                     | Meaningful, inspiring           | Statements given by the youth researchers post-survey/discussion                                                                                                                                                                              |
|                     | New knowledge, perspectives     | Responses that relate or refer to the youth identifying the need to learn, prepare, or engage in their culture/heritage/artforms/traditions/community/policy/elders/etc.                                                                      |
|                     | Survey/interview                | Responses that relate or refer to the youth feeling that their conversations were meaningful and/or feeling inspired by their disucssion/CM                                                                                                   |
|                     |                                 | Responses that relate to or refer to the youth gaining new understandings, information, or outlooks from discussions                                                                                                                          |
|                     |                                 | Responses that relate or refer to the survey or interview process including notes about issues or process, technical issues, survey questions, feelings/opinions about the survey, etc.                                                       |
